# Supplementary material
Source: publisher figshare collection journal article supplement (https://sage.figshare.com/ndownloader/files/18091004)

**A**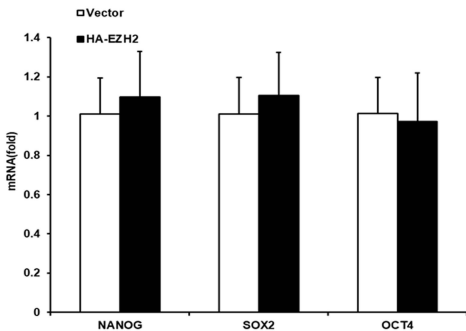**B**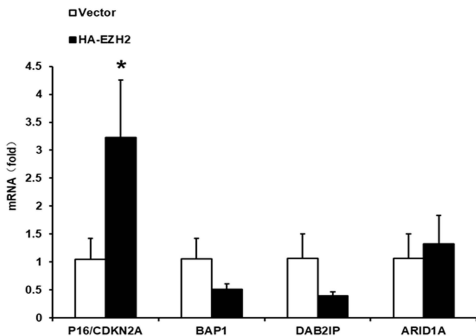

Supplement: Supplementary file 1 [file 18091004]
